# Supplementary material
Source: PubMed Central journal article supplement (PMC9976381)

# The effects of flow settings during high-flow nasal cannula support: A Systematic Review

## Supplementary file

Jie Li,<sup>1#\*</sup> PhD, RRT; Fai AlBuainain,<sup>1,2#</sup> BS; Wei Tan,<sup>3</sup> PhD; J. Brady Scott,<sup>1</sup> PhD, RRT; Oriol Roca,<sup>4,5,6</sup> MD, PhD; Tommaso Mauri,<sup>7,8</sup> MD, PhD.

|                                                                                                             |            |
|-------------------------------------------------------------------------------------------------------------|------------|
| <b>Figure S1. Assessments of risk of bias for randomized controlled or crossover trials</b>                 | <b>p 2</b> |
| <b>Table S1: Assessment on risk of bias for included non-randomized trials using Newcastle-Ottawa Scale</b> | <b>p 3</b> |
| <b>Table S2: Report of peak tidal inspiratory flow for adults</b>                                           | <b>p 4</b> |
| <b>Table S3. Analysis of global and regional end-expiratory lung volume with different HFNC flow</b>        | <b>p 5</b> |
| <b>Table S4. RCTs of different flows during procedural sedation</b>                                         | <b>p 6</b> |
| <b>Figure S2. Gas exchanges during procedural sedation with different flows</b>                             | <b>p 7</b> |

**Figure S1: Assessments of risk of bias for randomized controlled or crossover trials**

| Unique ID      | Study ID             | Experimental                              | Comparator                         | D1 | D2 | D3 | D4 | D5 | Overall |                                               |
|----------------|----------------------|-------------------------------------------|------------------------------------|----|----|----|----|----|---------|-----------------------------------------------|
| Mauri 2017     | NA                   | 30,45,60 L/min                            | face mask 12L/min                  | !  | +  | +  | +  | !  | !       | + Low risk                                    |
| Basile 2020    | NA                   | 1.0 and 1.5 L/kg/min                      | 0.5 L/kg/min                       | !  | +  | +  | +  | !  | !       | ! Some concerns                               |
| Delrome 2017   | NCT02494154          | 40 and 60 L/min                           | 20 L/min                           | !  | +  | +  | +  | +  | !       | - High risk                                   |
| Natalini 2019  | NA                   | 10, 30, 50 L/min                          | face mask 8 L/min                  | !  | +  | +  | +  | !  | !       |                                               |
| Parke 2013     | ACTRN 12609000305224 | 40 and 50 L/min                           | 30 L/min                           | !  | +  | +  | +  | +  | !       | D1 Randomisation process                      |
| Mauri 2019     | NA                   | 60 L/min                                  | 30 L/min                           | !  | +  | +  | +  | !  | !       | D2 Deviations from the intended interventions |
| Theologou 2021 | NCT03282552          | 40 and 60 L/min                           | venturi mask 15 L/min              | +  | !  | +  | !  | +  | !       | D3 Missing outcome data                       |
| Braunlich 2018 | NCT02504814          | 40 L/min through both prongs              | 20 L/min through both prongs       | !  | +  | +  | +  | +  | !       | D4 Measurement of the outcome                 |
| Mckinstry 2017 | ACTRN12615000471583  | 15, 30 and 45 L/min                       | 0 L/min                            | +  | +  | +  | +  | +  | +       | D5 Selection of the reported result           |
| Pisani 2017    | NCT02363920          | HFNC of 20 and 30 L/min , 1 Nasal cannula |                                    | !  | +  | +  | +  | +  | !       |                                               |
| Allen 2021     | NA                   | 10, 20, 30,40, 50 and 60 L/r 0 L/min      |                                    | !  | +  | +  | +  | !  | !       |                                               |
| Arizono 2021   | UMIN 000041825       | 10, 20, 30, 40, 50 and 60 L/ 0 L/min      |                                    | !  | +  | +  | +  | +  | !       |                                               |
| Sanuki 2017    | NA                   | 15, 30 and 45 L/min                       | 0 L/min                            | !  | +  | +  | +  | !  | !       |                                               |
| Delrome 2020   | NCT02495675          | 20,40 and 60 L/min                        | Nasal cannula 5 L/min              | +  | +  | +  | +  | +  | +       |                                               |
| Moller 2017    | NCT01509703          | 30 and 45 L/min                           | 15 L/min                           | !  | +  | +  | +  | +  | !       |                                               |
| Le Moigne 2021 | NCT04096183          | 30 and 60 with 2 mouth cor 0 L/min        |                                    | !  | +  | +  | +  | +  | !       |                                               |
| Vieira 2022    | NCT03902639          | 20, 40 and 60 L/min with 2 CPAP 4 cmH2O   |                                    | !  | +  | +  | +  | +  | !       |                                               |
| Ritchie 2011   | NA                   | 20, 30, 40, 50 and 60 L/min 10 L/min      |                                    | +  | +  | +  | +  | !  | !       |                                               |
| Yi 2020        | ChiCTR1800016621     | 40 and 60 L/min                           | nasopharyngeal airway with 0 L/min | !  | +  | +  | +  | +  | !       |                                               |
| Lucangelo 2012 | NA                   | 40 and 60 L/min                           | venturi mask 40L/min               | +  | +  | +  | +  | !  | !       |                                               |
| Sago 2015      | NA                   | 30 and 50 L/min                           | Nasal cannula 5 L/min              | !  | +  | +  | +  | !  | !       |                                               |
| Mauri 2018     | NA                   | 60 L/min (31 and 37 °C)                   | 30 (31 and 37 °C)                  | !  | +  | +  | !  | !  | !       |                                               |

**Table S1: Assessment on risk of bias for included non-randomized trials using Newcastle-Ottawa Scale.**

| Author, year    | Selection                                |                                     |                           | Comparability                                     |                                           |                           | Outcome               |                                             | Quality <sup>#</sup> |                                  |
|-----------------|------------------------------------------|-------------------------------------|---------------------------|---------------------------------------------------|-------------------------------------------|---------------------------|-----------------------|---------------------------------------------|----------------------|----------------------------------|
|                 | Representativeness of the exposed cohort | Selection of the non-exposed cohort | Ascertainment of exposure | Outcome of interest not present at start of study | Controls for age, sex, and marital status | Controls of other factors | Assessment of outcome | Follow-up long enough for outcomes to occur |                      | Adequacy of follow-up of cohorts |
| Li, 2021        | *                                        | *                                   | *                         | MD                                                |                                           | *                         | *                     | *                                           | *                    | Good                             |
| Butt, 2020      |                                          | *                                   | *                         |                                                   |                                           |                           | *                     | *                                           | *                    | Poor                             |
| Pinkham         |                                          |                                     | *                         | *                                                 |                                           |                           | *                     | *                                           | *                    | Poor                             |
| Zhang, 2020     | *                                        | *                                   | *                         | *                                                 |                                           | *                         | *                     | *                                           | *                    | Good                             |
| Braunlich, 2016 |                                          | *                                   | *                         | MD                                                |                                           | *                         | *                     | MD                                          | *                    | Fair                             |
| Rittayami, 2019 |                                          | *                                   | *                         | MD                                                |                                           | *                         | *                     | *                                           | *                    | Fair                             |
| Garofalo, 2019  | *                                        | *                                   | *                         | *                                                 |                                           | *                         | *                     | *                                           | *                    | Good                             |
| Okuda, 2017     |                                          | *                                   | *                         | *                                                 |                                           | *                         | *                     |                                             | *                    | Good                             |
| Plotnikow, 2018 |                                          | *                                   | *                         | *                                                 |                                           | *                         | *                     |                                             | *                    | Good                             |
| Groves 2007     |                                          | *                                   | *                         | *                                                 | *                                         | *                         | *                     | MD                                          | *                    | Good                             |
| Parke 2015      |                                          | *                                   | *                         | *                                                 |                                           | *                         | *                     |                                             | *                    | Good                             |

MD, missing data. <sup>#</sup>The quality (good, fair, and poor) was defined based on the following criteria: Good - 3 or 4 stars in 'Selection' domain AND 1 or 2 stars in 'Comparability' domain AND 2 or 3 stars in 'Outcome' domain; Fair - 2 stars in 'Selection' domain AND 1 or 2 stars in 'Comparability' domain AND 2 or 3 stars in 'Outcome' domain; Poor - 0 or 1 star in 'Selection' domain OR 0 star in 'Comparability' domain OR 0 or 1 star in 'Outcome' domain.

**Table S2: Report of peak tidal inspiratory flow for adults**

| Author /year                       | Study design | N  | Population              | Evaluation method                  | Activity/breathing pattern | PTIF (L/min)               | MIF (L/min)                |
|------------------------------------|--------------|----|-------------------------|------------------------------------|----------------------------|----------------------------|----------------------------|
| Butt et al. 2021 <sup>44</sup>     | Prospective  | 19 | Mechanically ventilated | Ventilator (Drager V500)           | NA                         | 60 (40, 80) <sup>*ab</sup> | 40 (25, 55) <sup>*ab</sup> |
| Li et al, 2021 <sup>6</sup>        | Prospective  | 49 | AHRF                    | NICO2 flow sensor with mask        | Rest                       | 34 ± 9;<br>31 (27, 42)     | NA                         |
| Chanques et al, 2013 <sup>54</sup> | Prospective  | 10 | Post tracheostomy       | Minitrach™ II cannula              | Rest                       | 30 (27, 32)                | NA                         |
| Li et al, 2021 <sup>53</sup>       | RCT          | 75 | Asthma/COPD             | Spirometer                         | Rest                       | 36.4 (34.5, 38.2)          | NA                         |
| Ritchie et al. 2011 <sup>13</sup>  | Prospective  | 10 | Healthy volunteers      | Spiroson-AS ultrasonic flow sensor | Rest                       | 27.9 ± 9.2                 | NA                         |
|                                    |              |    |                         |                                    | Exercise                   | 119.9± 20.0                | NA                         |
| Anderson et al, 2006 <sup>52</sup> | Prospective  | 13 | Healthy volunteers      | Pneumotachometer                   | Light exercise             | 125.6 ± 29.2               | 100.3±18.9                 |
|                                    |              |    |                         |                                    | Moderate exercise          | 185.3±37.1                 | 150.1±35.4                 |
|                                    |              |    |                         |                                    | Heavy exercise             | 254.7±57.8                 | 218.4±53.7                 |

**Abbervations:** **PTIF:** peak tidal inspiratory flow (L/min), **MIF:** mean inspiratory flow (L/min), **AHRF:** acute hypoxemic respiratory, **COPD:** chronic obstructive pulmonary disease, **PS:** pressure support, **PEEP:** positive end expiratory pressure

\*Measured with endotracheal tube during invasive ventilation (PS 0, PEEP 0)

a Values extracted from graph using graph reader website

b Values are calculated

**Table S3. Analysis of global and regional end-expiratory lung volume with different HFNC flow**

|         | Author/year                          | Position                | Flow (L/min)                             | $\Delta\text{EELI}_{\text{global}}$      | $\Delta\text{EELI}_{\text{non-dependent}}$ |                                          | $\Delta\text{EELI}_{\text{dependent}}$ |              |
|---------|--------------------------------------|-------------------------|------------------------------------------|------------------------------------------|--------------------------------------------|------------------------------------------|----------------------------------------|--------------|
|         |                                      |                         |                                          |                                          | ROI 1                                      | ROI 2                                    | ROI 3                                  | ROI 4        |
| AHRF    | Mauri et al. 2017 <sup>7</sup>       | Semi-recumbent position | 12 (facial mask)                         | baseline                                 | baseline                                   |                                          | baseline                               |              |
|         |                                      |                         | 30                                       | 74±174 ml                                | 53±183 ml                                  |                                          | 31±119 ml                              |              |
|         |                                      |                         | 45                                       | 115±142 ml                               | 64±133 ml                                  |                                          | 59±121 ml                              |              |
|         |                                      |                         | 60                                       | 230±237 ml <sup>a</sup>                  | 128±185 ml                                 |                                          | 93±150 ml <sup>a</sup>                 |              |
|         | Basile et al. 2020 <sup>8</sup>      | Semi-recumbent position | 0.5 L/kg/min (35)                        | baseline                                 | baseline                                   |                                          | baseline                               |              |
|         |                                      |                         | 1.0 L/kg/min (65)                        | 366.7 ±1264 au <sup>a,d</sup>            | 513.9±1239.1 au <sup>d</sup>               |                                          | -147.2±1000 au <sup>d</sup>            |              |
|         |                                      |                         | 1.5 L/kg/min (100)                       | 760.8 ±1096 au <sup>a,d</sup>            | 819±1099 au <sup>a,d</sup>                 |                                          | -58.2±953 au <sup>d</sup>              |              |
|         | Zhang et al. 2020 <sup>9</sup>       | Semi-recumbent position | 0                                        | baseline                                 | baseline                                   | baseline                                 | baseline                               | baseline     |
|         |                                      |                         | 20                                       | 7.2 (-5.1, 18.7)%                        | 0.3(-0.1,2.7)%                             | 2.12 (-3.2,7.4)%                         | 2.51 (-3.8, 6.2)%                      | 0.21(0,0.4)% |
|         |                                      |                         | 40                                       | 10.6 (-3.4, 42.0)% <sup>a,b</sup>        | 0.18 (0, 3.1)%                             | 8.6 (-1.4,18.2)% <sup>a,b</sup>          | 3.94(-3.9, 14.5)%                      | 0(0,1.8)%    |
| 60      |                                      |                         | 26.3(10.7,60.8)% <sup>a,b,c</sup>        | 1.61 (0,4.6)%                            | 16.15(4.0,27.9)% <sup>a,b</sup>            | 14.3(4.0,32.3)% <sup>a,b,c</sup>         | 0.33(0,2.4)%                           |              |
| Healthy | Plotnikow et al. 2018 <sup>19f</sup> | Supine                  | 0                                        | baseline                                 | baseline                                   |                                          | baseline                               |              |
|         |                                      | Setting 45°             |                                          | 1.05 (0.72, 1.34) Units <sup>a</sup>     | 0.2 (0.11, 0.34) Units <sup>a</sup>        |                                          | 0.33 (0.23, 0.47) Units <sup>a</sup>   |              |
|         | 30                                   |                         | 1.12 (0.8, 2.01) Units <sup>a,b</sup>    | 0.27 (0.08, 0.45) Units <sup>a,b</sup>   |                                            | 0.39 (0.24, 0.64) Units <sup>a,b</sup>   |                                        |              |
|         | 50                                   |                         | 1.44 (1.05, 2.16) Units <sup>a,b,c</sup> | 0.33 (0.18, 0.53) Units <sup>a,b,c</sup> |                                            | 0.42 (0.31, 0.65) Units <sup>a,b,c</sup> |                                        |              |

**Abbervations:** AHRF, acute hypoxemic respiratory failure; EELI, end expiratory lung impedance; ROI, region of interest

a vs. baseline, p < 0.05

b vs. 1<sup>st</sup> setting, p < 0.05

c vs. 2<sup>nd</sup> setting, p < 0.05

d Values reported directly from the author

e EELI results reported as au not ml in this study

f EELI results reported as unit not ml in this study

**Table S4. RCTs of different flows during procedural sedation**

| Author/year                         | Study design | N  | Patients                                     | Flow (L/min) | FiO <sub>2</sub> or SpO <sub>2</sub> | PaCO <sub>2</sub> (mmHg) | PF (%)               | SpO <sub>2</sub> (%)     | PaO <sub>2</sub> (mmHg) | others                                                                                                    |
|-------------------------------------|--------------|----|----------------------------------------------|--------------|--------------------------------------|--------------------------|----------------------|--------------------------|-------------------------|-----------------------------------------------------------------------------------------------------------|
| Yi et al. 2020 <sup>47</sup>        | RCT          | 23 | Craniotomy with IVS                          | 6            | 0.60                                 | 43.6±5.9                 | 275.1±92.8           | 99.9±0.2                 | NA                      | UAWO: 10<br>AWI: 6<br>Awakening duration: 99 (85,113) min<br>Requiring treatment for increased BRS: 6     |
|                                     |              | 22 |                                              | 40           |                                      | 44.1±2.8                 | 475±106.1            | 99.5±0.8                 | NA                      | UAWO: 3<br>AWI: 0<br>Awakening duration: 105 (75,136) min<br>Requiring treatment for increased BRS: 3     |
|                                     |              | 20 |                                              | 60           |                                      | 42.3±4.9                 | 465.4±78             | 99.8±0.3                 | NA                      | UAWO: 1<br>AWI: 0<br>Awakening duration: 141.5 (98,198.5) min<br>Requiring treatment for increased BRS: 5 |
| Sago et al. 2015 <sup>49</sup>      | RCT          | 10 | Dental procedure with IVS                    | 5            | 0.40                                 | 45.3±1.2 <sup>a</sup>    | NA                   | 95 (94,96) <sup>a</sup>  | 91±3.5 <sup>a</sup>     | Intervention: 4 <sup>a</sup>                                                                              |
|                                     |              | 10 |                                              | 30           |                                      | 44.3±1.9 <sup>a</sup>    | NA                   | 98 (97,99) <sup>a</sup>  | 178±9 <sup>a</sup>      | Intervention: 2 <sup>a</sup>                                                                              |
|                                     |              | 10 |                                              | 50           |                                      | 41.6±1.3 <sup>a</sup>    | NA                   | 99 (98,100) <sup>a</sup> | 225±11 <sup>a</sup>     | Intervention: 0 <sup>a</sup>                                                                              |
| Lucangelo et al. 2012 <sup>48</sup> | RCT          | 15 | Bronchoscopy with pulmonary disease with IVS | 40 VM        | 0.50                                 | 42.7 (41, 44.4)          | 165 (127.4, 199.2)   | 94 (92,96)               | 82.5 (63.7, 99.6)       | NA                                                                                                        |
|                                     |              | 15 |                                              | 40           |                                      | 43.2 (37.9, 47.6)        | 140.6(125.6, 153.6)  | 92 (90, 95)              | 70 (62.8, 76.8)         | NA                                                                                                        |
|                                     |              | 15 |                                              | 60           |                                      | 43.6 (42.4, 48)          | 244.8 (181.6, 366.8) | 98 (97,99)               | 122.4 (90.8, 183.4)     | NA                                                                                                        |

**Abbreviations:** FiO<sub>2</sub>: fraction of inspired oxygen (%), SpO<sub>2</sub>: saturation of oxygen using pulse oximeter (%), PaCO<sub>2</sub>: arterial partial pressure of carbon dioxide (mmHg), PF: PaO<sub>2</sub>/ FiO<sub>2</sub>, NPA: nasopharyngeal airway, UAWO: upper airway obstruction (%), AWI: airway injury (%), BRS: brain relaxation score (%), IVS: intravenous sedation, Interventions: the procedures needed to improve ventilation such as jaw lifting or sniffing position. RCT: randomized control trial.

A Values extracted from graph using graph reader website

**Figure S2. Gas exchanges during procedural sedation with different flows**

**A. PaCO<sub>2</sub>**

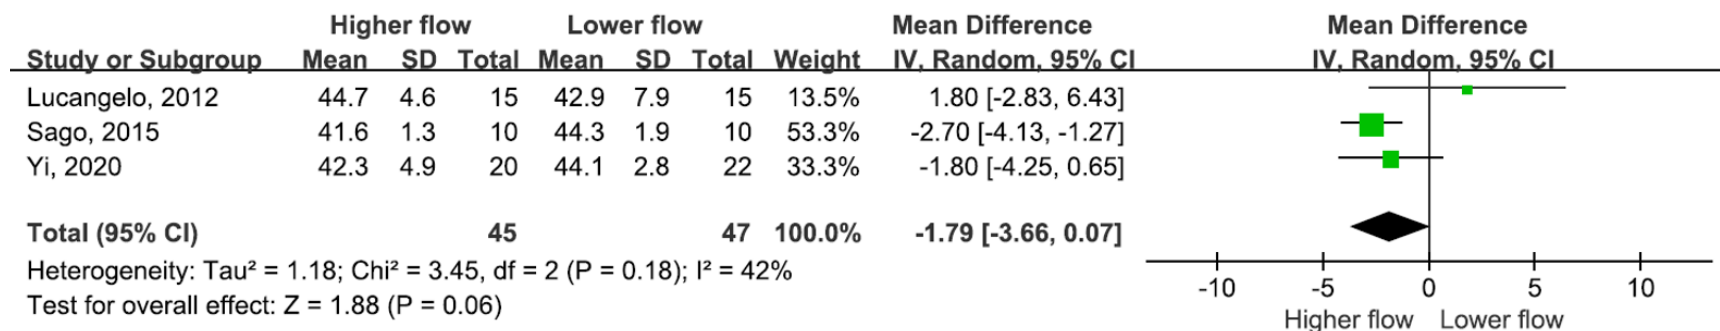

**B. SpO<sub>2</sub>**

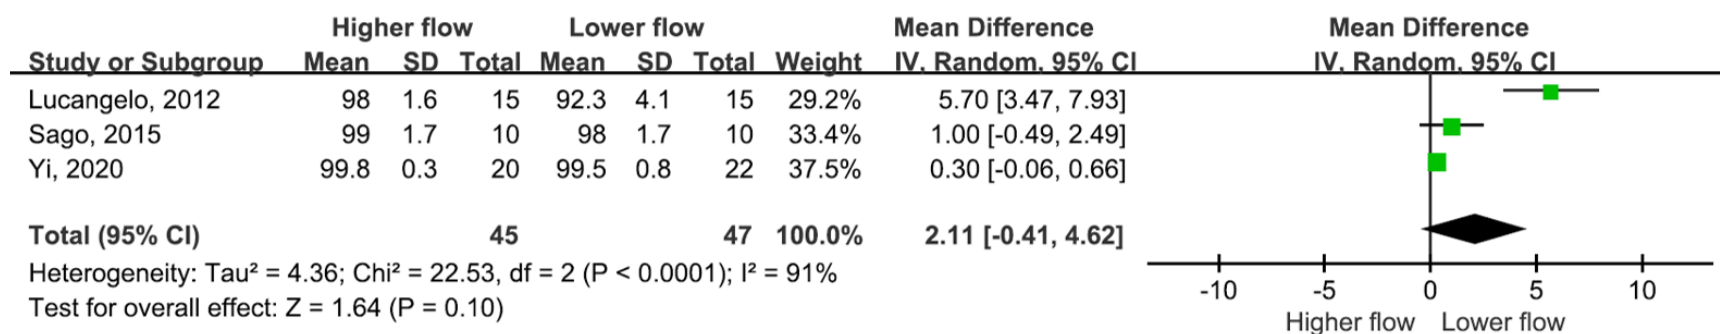

**C. PaO<sub>2</sub>/F<sub>i</sub>O<sub>2</sub>**

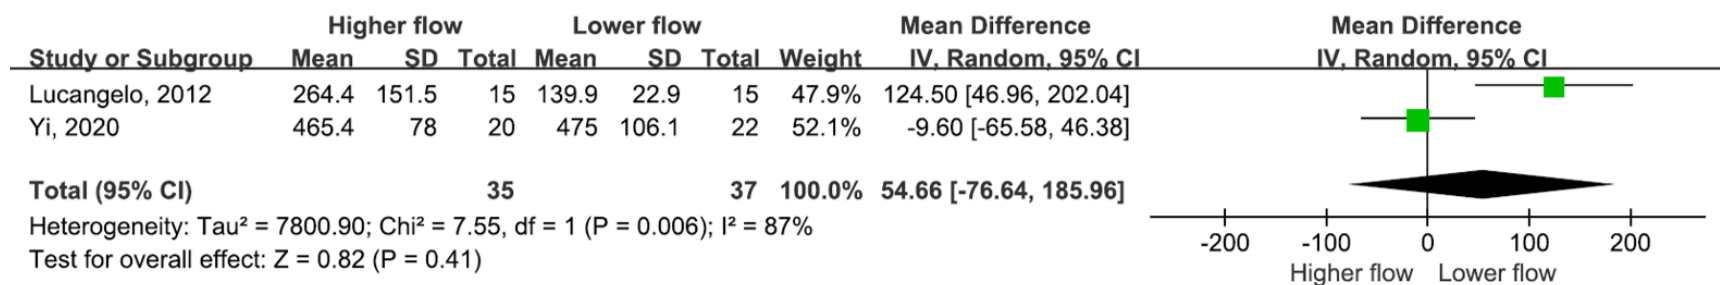

Supplement: 13054_2023_4361_MOESM1_ESM.pdf [file 13054_2023_4361_MOESM1_ESM.pdf]
